# Supplementary material for: Limosilactobacillus fermentum MG4295 Improves Hyperglycemia in High-Fat Diet-Induced Mice
Source: MDPI journal article supplement (doi:10.3390/foods11020231), 2022-01-15
Supplement: s1 [file s1]

**Table S1.** Primers sequence used for qRT-PCR.

| Gene name    | Forward 5' to 3'        | Reverse 5' to 3'       |
|--------------|-------------------------|------------------------|
| <i>IRS-1</i> | AAGGAGGTCTGGCAGGTTATC   | ATGGTCTTGCTGGTCAGGC    |
| <i>AKT</i>   | ACTCATTCCAGACCCACGAC    | CCGGTACACCACGTTCTTCT   |
| <i>GLUT4</i> | CATTCCCTGGTTCATTGTGG    | GAAGACGTAAGGACCCATAGC  |
| <i>G6Pc</i>  | TCTTGTGGTTGGGATTCTGG    | CGGATGTGGCTGAAAGTTTC   |
| <i>PEPCK</i> | CCATCCCAACTCGAGATTCTG   | CTGAGGGCTTCATAGACAAGG  |
| <i>GAPDH</i> | CACTCACGGCAAATTCAACGGCA | GACTCCACGACATACTCAGCAC |

*IRS-1*, insulin receptor substrate-1; *AKT*, protein kinase B; *GLUT4*, glucose transporter-4; *G6Pc*, glucose-6-phosphatase catalytic subunit; *PEPCK*, phosphoenolpyruvate carboxykinase; *GAPDH*, glyceraldehyde 3-phosphate dehydrogenase.

**Table S2.** Liver and adipose tissues weight.

| Groups | Liver     | Epididymal | Mesenteric | Perirenal   | Retroperitoneal | Subcutaneous |
|--------|-----------|------------|------------|-------------|-----------------|--------------|
| ND     | 1.2 ± 0.2 | 0.4 ± 0.05 | 0.4 ± 0.1  | 0.03 ± 0.02 | 0.2 ± 0.1       | 0.3 ± 0.1    |
| HFD    | 1.7 ± 0.3 | 1.9 ± 0.4  | 1.4 ± 0.4  | 0.3 ± 0.1   | 0.7 ± 0.1       | 2.0 ± 0.6    |
| MG4295 | 1.5 ± 0.4 | 2.1 ± 0.6  | 1.3 ± 0.6  | 0.3 ± 0.1   | 0.8 ± 0.2       | 1.8 ± 0.6    |

Data are presented as mean ± SD ( $n = 8$ ).
